# Supplementary material for: Genetic inhibition of CRMP2 phosphorylation at serine 522 promotes axonal regeneration after optic nerve injury
Source: PubMed Central journal article supplement (PMC6510754; doi:10.1038/s41598-019-43658-w), 2019-05-10

## ***Supplemental Information***

### **Genetic inhibition of CRMP2 phosphorylation promotes axonal regeneration after optic nerve injury**

Shunsuke Kondo<sup>1</sup>, Kazuya Takahashi<sup>1</sup>, Yuki Kinoshita<sup>1</sup>, Jun Nagai<sup>1,2</sup>, Shuji Wakatsuki<sup>3</sup>, Toshiyuki Araki<sup>3</sup>, Yoshio Goshima<sup>4</sup>, Toshio Ohshima<sup>1, 5, 6</sup>

<sup>1</sup>*Department of Life Science and Medical Bio-Science, Waseda University, Shinjuku-ku, Tokyo, 162-8480 Japan*

<sup>2</sup>*Research Fellow of Japan Society for the Promotion of Science*

<sup>3</sup>*Department of Peripheral Nervous System Research, National Institute of Neuroscience, National Center of Neurology and Psychiatry, 4-11 Ogawa-higashi, Kodaira, Tokyo 187-8502, Japan*

<sup>4</sup>*Department of Molecular Pharmacology and Neurobiology, Yokohama City University Graduate School of Medicine, Yokohama 236-0004 Japan*

<sup>5</sup>*Institute for Advanced Research of Biosystem Dynamics, Waseda Research Institute for Science and Engineering, Waseda University*

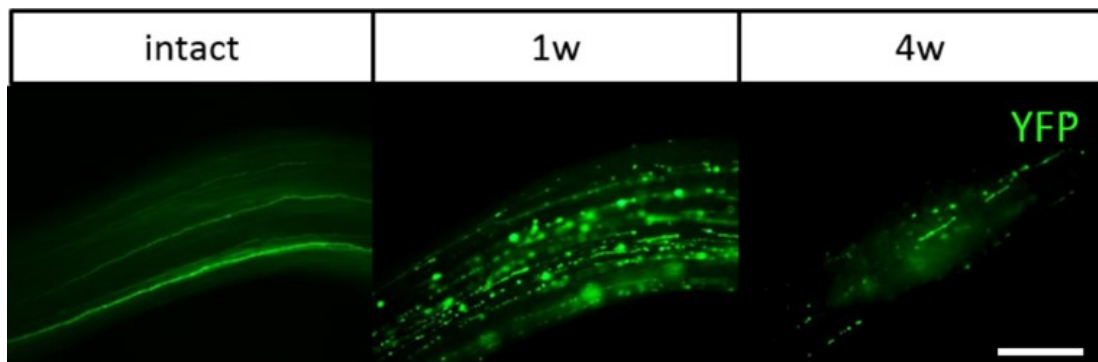

#### **Supplemental Fig.1 Axonal degradation after optic nerve injury in YFP-H mouse**

Axonal degradation after optic nerve injury in YFP-H mouse

A small percentage of optic nerve axons are YFP-positive in YFP-H mice (intact). Axonal degradation appeared as the fragmentation of fluorescent signals one week after OCN (1w). YFP-positive axons mostly disappeared four weeks after OCN (4w). Scale bar = 200  $\mu$ m.

The full scans of Western blotting data are shown in below;

Figure 4 A

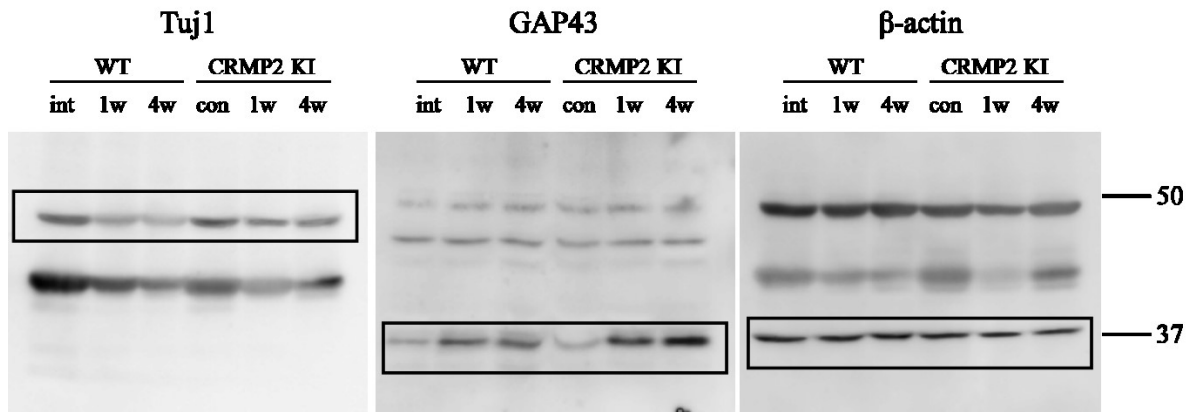

Supplement: 41598_2019_43658_MOESM1_ESM.pdf [file 41598_2019_43658_MOESM1_ESM.pdf]
